# Supplementary material for: PLCH1 overexpression promotes breast cancer progression and predicts poor prognosis through the ERK1/2-EGR1 axis
Source: Front Oncol. 2025 May 30;15:1577114. doi: 10.3389/fonc.2025.1577114 (PMC12162997; doi:10.3389/fonc.2025.1577114)
Supplement: Supplementary file 1 [file DataSheet1.docx]

**PLCH1 overexpression promotes breast cancer progression and predicts poor prognosis through the ERK1/2-EGR1 axis**

Jing Li1,#, Fenge Jiang2,#, Congcong Wang2,#, Ping Sun2, Lei Song3,*, Jiannan Liu2,*

1The 2nd Medical College of Binzhou Medical University, 264003, Yantai, China.

2Department of Oncology, The Affiliated Yantai Yuhuangding Hospital of Qingdao University, 264000, Yantai, China.

3Department of Geriatric Medicine, The Affiliated Yantai Yuhuangding Hospital of Qingdao University, 264000, Yantai, China.

#Equal contribution

*Corresponding authors:

Jiannan Liu

Department of Oncology, The Affiliated Yantai Yuhuangding Hospital of Qingdao University, No. 20 Yuhuangding East Road, 264000, Yantai, China. E-mail: [ljnwcc@163.com](mailto:Liujiannansun2013@163.com).

Lei Song

Department of Geriatric Medicine, The Affiliated Yantai Yuhuangding Hospital of Qingdao University, No. 20 Yuhuangding East Road, 264000, Yantai, China. E-mail: [372042212@qq.com](mailto:Liujiannansun2013@163.com).





**Figure S1. PLCH1 knockdown induces cell cycle arrest in breast cancer cells. (A)**. Flow cytometric analysis of cell cycle distribution in BT-474 breast cancer cells treated with control siRNA (Control) or PLCH1-specific siRNAs (si-PLCH1#1 and si-PLCH1#3). **(B)** Quantification of the cell cycle distribution in the G0/G1, S, and G2/M phases.*, P < 0.05.





**Figure S2. PLCH1 overexpression activates the ERK/EGR1 signaling axis, inhibiting apoptosis and promoting cell cycle progression in breast cancer cells. (A)**. Western blot analysis of PLCH1, Cyclin B1, and CDK1 protein levels in BT-474 breast cancer cells transfected with either the vector (Vector) or the PLCH1 overexpression vector (OE). **(B)** Quantification of PLCH1, EGR1, p-ERK/ERK, Bcl-2/BAX, CDK1, and cyclin B1 protein levels based on Western blot results. *, P < 0.05. **, P < 0.01. ***, P < 0.001.

**

Figure S3. (A)**. Western blot analysis of PLCH1, and E-cadherin protein levels in BT-474 breast cancer cells treated with control siRNA (Control) or PLCH1-specific siRNAs (si-PLCH1#1 and si-PLCH1#3). **(B)** Quantification of PLCH1, and E-cadherin protein levels based on Western blot results. ns, difference is not significant.





**Figure S4. PLCH1 knockdown does not affect the migration and invasion abilities of breast cancer cells. (A and C)**. Wound scratch assay and Transwell invasion assay were employed to assess the effect of PLCH1 knockdown on the migration and invasion capabilities of BT-474 cells. **(B and D)** Quantification of cell scratch closure rate and the number of invading cells. ns, difference is not significant. *, P < 0.05. **, P < 0.01. ***, P < 0.001.





**Figure S5. PLCH1 knockdown enhances the sensitivity of breast cancer cells to cisplatin.** CCK-8 assay was performed to evaluate the impact of PLCH1 knockdown on the sensitivity of BT-474 cells to cisplatin (CDDP). * P < 0.05, ** P < 0.01, **** P < 0.001.
